# Supplementary material for: Effects of diabetes definition on global surveillance of diabetes prevalence and diagnosis: a pooled analysis of 96 population-based studies with 331 288 participants
Source: PubMed Central journal article supplement (PMC4673089; doi:10.1016/s2213-8587(15)00129-1), 2015-08
Supplement: mmc1.pdf [file mmc1.pdf]

## Supplementary appendix

This appendix formed part of the original submission and has been peer reviewed. We post it as supplied by the authors.

Supplement to: NCD Risk Factor Collaboration (NCD-RisC). Effects of diabetes definition on global surveillance of diabetes prevalence and diagnosis: a pooled analysis of 96 population-based studies with 331 288 participants. *Lancet Diabetes Endocrinol* 2015; published online June 22. [http://dx.doi.org/10.1016/S2213-8587\(15\)00129-1](http://dx.doi.org/10.1016/S2213-8587(15)00129-1).

## Webmaterials

### Table of Contents

|                                                                                                                                                                                                                                                                                                                                                                        |    |
|------------------------------------------------------------------------------------------------------------------------------------------------------------------------------------------------------------------------------------------------------------------------------------------------------------------------------------------------------------------------|----|
| <b>Webtable 1:</b> Population-based surveys with individual-level data .....                                                                                                                                                                                                                                                                                           | 1  |
| <b>Webtable 2:</b> Population-based surveys with summarised prevalence data .....                                                                                                                                                                                                                                                                                      | 6  |
| <b>Webfigure 1:</b> Regional random effects in the regression of diabetes prevalence defined based on HbA <sub>1c</sub> (HbA <sub>1c</sub> ≥ 6.5% or history of diabetes or using insulin or oral hypoglycaemic agents) against diabetes prevalence defined based on FPG (FPG ≥ 7.0 mmol/L or history of diabetes or using insulin or oral hypoglycaemic agents) ..... | 9  |
| <b>Webfigure 2:</b> Random effect meta-analysis of diabetes diagnostic sensitivity of HbA <sub>1c</sub> ≥ 6.5% vs. FPG ≥ 7.0 mmol/L in previously-undiagnosed participants .....                                                                                                                                                                                       | 11 |
| <b>Webfigure 3:</b> Random effect meta-analysis of diabetes diagnostic specificity of HbA <sub>1c</sub> ≥ 6.5% vs. FPG ≥ 7.0 mmol/L in previously-undiagnosed participants .....                                                                                                                                                                                       | 13 |
| <b>Webfigure 4:</b> Random effect meta-analysis of diabetes diagnostic sensitivity of HbA <sub>1c</sub> ≥ 6.5% vs. 2hOGTT ≥ 11.1 mmol/L in previously-undiagnosed participants .....                                                                                                                                                                                   | 15 |
| <b>Webfigure 5:</b> Random effect meta-analysis of diabetes diagnostic specificity of HbA <sub>1c</sub> ≥ 6.5% vs. 2hOGTT ≥ 11.1 mmol/L in previously-undiagnosed participants .....                                                                                                                                                                                   | 17 |
| <b>Webfigure 6:</b> Random effect meta-analysis of diabetes diagnostic sensitivity of HbA <sub>1c</sub> ≥ 6.5% vs. FPG ≥ 7.0 mmol/L or 2hOGTT ≥ 11.1 mmol/L in previously-undiagnosed participants .....                                                                                                                                                               | 19 |
| <b>Webfigure 7:</b> Random effect meta-analysis of diabetes diagnostic specificity of HbA <sub>1c</sub> ≥ 6.5% vs. FPG ≥ 7.0 mmol/L or 2hOGTT ≥ 11.1 mmol/L in previously-undiagnosed participants .....                                                                                                                                                               | 21 |
| <b>Webfigure 8:</b> Random effect meta-analysis of diabetes diagnostic sensitivity of FPG ≥ 7.0 mmol/L vs. 2hOGTT ≥ 11.1 mmol/L in previously-undiagnosed participants .....                                                                                                                                                                                           | 23 |
| <b>Webfigure 9:</b> Random effect meta-analysis of diabetes diagnostic specificity of FPG ≥ 7.0 mmol/L vs. 2hOGTT ≥ 11.1 mmol/L in previously-undiagnosed participants .....                                                                                                                                                                                           | 25 |
| <b>References</b> .....                                                                                                                                                                                                                                                                                                                                                | 27 |

**Webtable 1:** Population-based surveys with individual-level data

| Survey name or citation                                                        | Country               | Survey year(s) | Participants $\geq 18$ years | Mean age (SD) | % Male | Level of representative-ness | Rural, urban or both | Biomarkers available           | Glucose measurement | HbA <sub>1c</sub> measurement |
|--------------------------------------------------------------------------------|-----------------------|----------------|------------------------------|---------------|--------|------------------------------|----------------------|--------------------------------|---------------------|-------------------------------|
| Australian Diabetes Obesity and Lifestyle Study (AusDiab)                      | Australia             | 1999-2000      | 11,173                       | 51.6 (14.4)   | 45.1%  | National                     | Both                 | FPG, 2hOGTT, HbA <sub>1c</sub> | Lab                 | Lab                           |
| Australian Diabetes Obesity and Lifestyle Study (AusDiab)                      | Australia             | 2004-2005      | 6,297                        | 56.5 (12.7)   | 45.3%  | National                     | Both                 | FPG, 2hOGTT, HbA <sub>1c</sub> | Lab                 | Lab                           |
| Australian Diabetes Obesity and Lifestyle Study (AusDiab)                      | Australia             | 2011-2012      | 4,481                        | 60.9 (11.2)   | 44.7%  | National                     | Both                 | FPG, 2hOGTT, HbA <sub>1c</sub> | Lab                 | Lab                           |
| North West Adelaide Health Study (NWAHS)                                       | Australia             | 1999-2003      | 3,979                        | 50.5 (16.4)   | 47.5%  | Community                    | Urban                | FPG, HbA <sub>1c</sub>         | Lab                 | Lab                           |
| North West Adelaide Health Study (NWAHS)                                       | Australia             | 2004-2006      | 3,163                        | 55.1 (15.5)   | 47.4%  | Community                    | Urban                | FPG, HbA <sub>1c</sub>         | Lab                 | Lab                           |
| North West Adelaide Health Study (NWAHS)                                       | Australia             | 2008-2010      | 2,420                        | 57.9 (14.3)   | 47.1%  | Community                    | Urban                | FPG, HbA <sub>1c</sub>         | Lab                 | Lab                           |
| The Central America Diabetes Initiative (CAMDI) Survey                         | Belize                | 2004-2005      | 1,306                        | 45.7 (17.4)   | 38.9%  | National                     | Both                 | FPG, 2hOGTT                    | Lab                 | -                             |
| Baependi Heart Study                                                           | Brazil                | 2010-2013      | 1,233                        | 44.6 (16.5)   | 40.6%  | Community                    | Rural                | FPG, HbA <sub>1c</sub>         | Lab                 | Lab                           |
| China Health and Nutrition Study (CHNS)                                        | China                 | 2009           | 8,496                        | 50.5 (15.0)   | 47.0%  | National                     | Both                 | FPG, HbA <sub>1c</sub>         | Lab                 | Lab                           |
| Hong Kong Cardiovascular Risk Factor Prevalence Study                          | China (Hong Kong SAR) | 1995-1996      | 2,762                        | 45.9 (12.9)   | 49.2%  | National                     | Both                 | FPG, 2hOGTT                    | Lab                 | -                             |
| The Central America Diabetes Initiative (CAMDI) Survey                         | Costa Rica            | 2004           | 974                          | 45.3 (17.1)   | 32.9%  | Community                    | Urban                | FPG, 2hOGTT                    | Lab                 | -                             |
| Costa Rican Longevity and Healthy Aging Study (CRELES), Pre-1945 Cohort Wave 1 | Costa Rica            | 2004-2006      | 2,587                        | 76.2 (10.2)   | 45.3%  | National                     | Both                 | FPG, HbA <sub>1c</sub>         | Lab                 | Lab                           |
| Costa Rican Longevity and Healthy Aging Study (CRELES), Pre-1945 Cohort Wave 2 | Costa Rica            | 2006-2008      | 2,218                        | 77.0 (9.6)    | 45.5%  | National                     | Both                 | FPG, HbA <sub>1c</sub>         | Lab                 | Lab                           |
| Young Finns Study (YFS), Rural                                                 | Finland               | 2011           | 786                          | 42.0 (4.9)    | 46.3%  | National                     | rural                | FPG, HbA <sub>1c</sub>         | Lab                 | Lab                           |
| Young Finns Study (YFS), Urban                                                 | Finland               | 2011           | 1,121                        | 41.9 (5.1)    | 44.2%  | National                     | Urban                | FPG, HbA <sub>1c</sub>         | Lab                 | Lab                           |
| The Three City Study (3C Study)                                                | France                | 2008-2010      | 693                          | 82.3 (4.4)    | 36.1%  | Community                    | Urban                | FPG, HbA <sub>1c</sub>         | Lab                 | Lab                           |
| Population Health Survey in Greenland                                          | Greenland             | 2005-2010      | 3,046                        | 44.5 (14.7)   | 43.9%  | National                     | Both                 | FPG, 2hOGTT, HbA <sub>1c</sub> | Lab                 | Lab                           |
| The Central America Diabetes Initiative (CAMDI) Survey                         | Guatemala             | 2001-2002      | 848                          | 40.5 (15.4)   | 33.6%  | Community                    | Urban                | FPG, 2hOGTT                    | Lab                 | -                             |
| The Central America Diabetes Initiative (CAMDI) Survey                         | Honduras              | 2003-2004      | 1,179                        | 40.6 (15.6)   | 35.5%  | Community                    | Urban                | FPG, 2hOGTT                    | Lab                 | -                             |
| New Delhi Birth Cohort, Follow-up Phase 1                                      | India                 | 1999-2002      | 1,434                        | 28.7 (1.4)    | 59.0%  | Community                    | Urban                | FPG, 2hOGTT                    | Lab                 | -                             |
| New Delhi Birth Cohort, Follow-up Phase 2                                      | India                 | 2006-2009      | 1,075                        | 35.6 (1.1)    | 59.5%  | Community                    | Urban                | FPG, 2hOGTT                    | Lab                 | -                             |
| Chennai Urban Rural Epidemiology Study (CURES)                                 | India                 | 2001-2004      | 2,349                        | 39.6 (12.9)   | 46.7%  | Community                    | Urban                | FPG, 2hOGTT, HbA <sub>1c</sub> | Lab                 | Lab                           |

| Survey name or citation                                                                                                          | Country                        | Survey year(s) | Participants ≥ 18 years | Mean age (SD) | % Male | Level of representativeness | Rural, urban or both | Biomarkers available           | Glucose measurement             | HbA <sub>1c</sub> measurement |
|----------------------------------------------------------------------------------------------------------------------------------|--------------------------------|----------------|-------------------------|---------------|--------|-----------------------------|----------------------|--------------------------------|---------------------------------|-------------------------------|
| High Prevalence of Diabetes and Cardiovascular Risk Factors Associated with Urbanization in India. Diabetes Care. 2008;31:893-8. | India                          | 2006           | 7,057                   | 38.0 (12.1)   | 47.0%  | Community                   | Both                 | FPG, 2hOGTT                    | Lab                             | -                             |
| Bruneck Study                                                                                                                    | Italy                          | 1990           | 908                     | 58.8 (11.4)   | 51.1%  | Community                   | Rural                | FPG, 2hOGTT                    | Lab                             | -                             |
| Bruneck Study                                                                                                                    | Italy                          | 1995           | 775                     | 62.6 (11.1)   | 50.6%  | Community                   | Rural                | FPG, 2hOGTT                    | Lab                             | -                             |
| Bruneck Study                                                                                                                    | Italy                          | 2000           | 692                     | 66.0 (10.3)   | 47.8%  | Community                   | Rural                | FPG, HbA <sub>1c</sub>         | Lab                             | Lab                           |
| Bruneck Study                                                                                                                    | Italy                          | 2005           | 568                     | 69.1 (9.5)    | 46.3%  | Community                   | Rural                | FPG, HbA <sub>1c</sub>         | Lab                             | Lab                           |
| Bruneck Study                                                                                                                    | Italy                          | 2010           | 484                     | 72.5 (8.5)    | 46.5%  | Community                   | Rural                | FPG, HbA <sub>1c</sub>         | Lab                             | Lab                           |
| Epidemiological Survey of Kiribati, Rural                                                                                        | Kiribati                       | 1981           | 970                     | 41.7 (15.8)   | 47.3%  | Subnational                 | Rural                | FPG, 2hOGTT                    | Lab                             | -                             |
| Epidemiological Survey of Kiribati, Urban                                                                                        | Kiribati                       | 1981           | 1,720                   | 35.9 (12.4)   | 50.6%  | Subnational                 | Urban                | FPG, 2hOGTT                    | Lab                             | -                             |
| Metabolic Syndrome Study in Malaysia                                                                                             | Malaysia                       | 2008           | 4,091                   | 48.1 (14.5)   | 34.9%  | National                    | Both                 | FPG, 2hOGTT, HbA <sub>1c</sub> | Lab                             | Lab                           |
| Mauritius Noncommunicable Disease Survey                                                                                         | Mauritius                      | 1987           | 4,960                   | 43.4 (13.2)   | 46.9%  | National                    | Both                 | FPG, 2hOGTT                    | Lab                             | -                             |
| Mauritius Noncommunicable Disease Survey                                                                                         | Mauritius                      | 1992           | 6,453                   | 45.6 (12.1)   | 46.2%  | National                    | Both                 | FPG, 2hOGTT                    | Lab                             | -                             |
| Mauritius Noncommunicable Disease Survey                                                                                         | Mauritius                      | 1998           | 5,355                   | 48.9 (11.4)   | 44.3%  | National                    | Both                 | FPG, 2hOGTT                    | Lab                             | -                             |
| Mauritius Noncommunicable Disease Survey                                                                                         | Mauritius                      | 2009           | 6,080                   | 45.9 (13.6)   | 45.7%  | National                    | Both                 | FPG, 2hOGTT                    | Lab                             | -                             |
| Trends in the Prevalence and Incidence of Non-insulin-dependent Diabetes Mellitus and Impaired Glucose Tolerance                 | Nauru                          | 1975-1976      | 425                     | 36.1 (13.5)   | 48.5%  | Subnational                 | Both                 | FPG, 2hOGTT                    | Lab                             | -                             |
| Trends in the Prevalence and Incidence of Non-insulin-dependent Diabetes Mellitus and Impaired Glucose Tolerance                 | Nauru                          | 1982           | 1,393                   | 36.5 (13.4)   | 47.5%  | National                    | Both                 | FPG, 2hOGTT                    | unknown                         | -                             |
| Trends in the Prevalence and Incidence of Non-insulin-dependent Diabetes Mellitus and Impaired Glucose Tolerance                 | Nauru                          | 1987           | 1,072                   | 39.3 (12.8)   | 45.3%  | National                    | Both                 | FPG, 2hOGTT                    | Lab                             | -                             |
| Trends in the Prevalence and Incidence of Non-insulin-dependent Diabetes Mellitus and Impaired Glucose Tolerance                 | Nauru                          | 1994           | 1,364                   | 39.0 (11.3)   | 47.1%  | National                    | Both                 | FPG, 2hOGTT                    | Lab                             | -                             |
| The Central America Diabetes Initiative (CAMDI) Survey                                                                           | Nicaragua                      | 2003-2004      | 1,552                   | 40.2 (14.8)   | 46.0%  | Community                   | Urban                | FPG, 2hOGTT                    | Lab                             | -                             |
| Survey in Ramallah District, Rural *                                                                                             | Occupied Palestinian Territory | 1996-1998      | 606                     | 37.9 (12.7)   | 33.5%  | Community                   | Rural                | FPG, 2hOGTT                    | Portable for FPG Lab for 2hOGTT | -                             |
| Survey in Ramallah District, Urban *                                                                                             | Occupied Palestinian Territory | 1996-1998      | 637                     | 38.6 (12.7)   | 28.6%  | Community                   | Urban                | FPG, 2hOGTT                    | Portable for FPG Lab for 2hOGTT | -                             |

| Survey name or citation                                                                | Country      | Survey year(s) | Participants $\geq 18$ years | Mean age (SD) | % Male | Level of representativeness | Rural, urban or both | Biomarkers available           | Glucose measurement | HbA <sub>1c</sub> measurement |
|----------------------------------------------------------------------------------------|--------------|----------------|------------------------------|---------------|--------|-----------------------------|----------------------|--------------------------------|---------------------|-------------------------------|
| Peru Migrant Study                                                                     | Peru         | 2007-2008      | 848                          | 50.6 (10.9)   | 48.0%  | Community                   | Both                 | FPG, HbA <sub>1c</sub>         | Lab                 | Lab                           |
| CRONICAS Cohort Study                                                                  | Peru         | 2009-2012      | 3,114                        | 55.2 (12.7)   | 48.7%  | Subnational                 | Both                 | FPG, HbA <sub>1c</sub>         | Lab                 | Lab                           |
| Seychelles Heart Survey IV                                                             | Seychelles   | 2014           | 1,212                        | 45.8 (11.1)   | 43.4%  | National                    | Both                 | FPG, HbA <sub>1c</sub>         | Lab                 | Lab                           |
| Cape Town Bellville South Cohort Study, Baseline Evaluation I                          | South Africa | 2008-2009      | 924                          | 54.3 (14.7)   | 23.6%  | Community                   | Urban                | FPG, 2hOGTT, HbA <sub>1c</sub> | Lab                 | Lab                           |
| Korea National Health and Nutrition Examination Survey                                 | South Korea  | 2011           | 5,715                        | 50.2 (16.6)   | 43.0%  | National                    | Both                 | FPG, HbA <sub>1c</sub>         | Lab                 | Lab                           |
| Korea National Health and Nutrition Examination Survey                                 | South Korea  | 2012           | 5,237                        | 50.5 (16.6)   | 42.1%  | National                    | Both                 | FPG, HbA <sub>1c</sub>         | Lab                 | Lab                           |
| Harmonizing Equation of Risk in Mediterranean countries Extremadura (The HERMEX study) | Spain        | 2007-2009      | 2,787                        | 50.8 (14.4)   | 46.5%  | Subnational                 | Both                 | FPG, HbA <sub>1c</sub>         | Lab                 | Lab                           |
| Study on Nutrition and Cardiovascular Risk in Spain                                    | Spain        | 2008-2010      | 12,821                       | 47.2 (16.7)   | 47.4%  | National                    | Both                 | FPG, HbA <sub>1c</sub>         | Lab                 | Lab                           |
| Turkish Adult Risk Factor Study                                                        | Turkey       | 2012-2013      | 425                          | 58.3 (10.1)   | 48.5%  | National                    | Both                 | FPG, HbA <sub>1c</sub>         | Portable            | Lab                           |
| The Funafuti Survey                                                                    | Tuvalu       | 1976           | 415                          | 38.2 (15.5)   | 49.4%  | Subnational                 | Both                 | FPG, 2hOGTT                    | Lab                 | -                             |
| Hertfordshire Cohort Study                                                             | UK           | 1999-2004      | 2,758                        | 65.7 (2.9)    | 52.5%  | Subnational                 | Both                 | FPG, 2hOGTT                    | Lab                 | -                             |
| Health Survey for England                                                              | UK           | 2003           | 1,096                        | 57.2 (14.0)   | 47.8%  | National                    | Both                 | FPG, HbA <sub>1c</sub>         | Lab                 | Lab                           |
| English Longitudinal Study of Ageing, Wave 2                                           | UK           | 2004-2005      | 3,701                        | 63.8 (7.4)    | 46.5%  | National                    | Both                 | FPG, HbA <sub>1c</sub>         | Lab                 | Lab                           |
| English Longitudinal Study of Ageing, Wave 4                                           | UK           | 2008-2009      | 4,008                        | 64.1 (7.5)    | 46.1%  | National                    | Both                 | FPG, HbA <sub>1c</sub>         | Lab                 | Lab                           |
| English Longitudinal Study of Ageing, Wave 6                                           | UK           | 2012-2013      | 3,465                        | 65.8 (7.6)    | 44.0%  | National                    | Both                 | FPG, HbA <sub>1c</sub>         | Lab                 | Lab                           |
| MRC National Survey of Health and Development (NSHD)                                   | UK           | 2009           | 1,758                        | 62.0 (0.0)    | 47.6%  | National                    | Both                 | FPG, HbA <sub>1c</sub>         | Lab                 | Lab                           |
| United States National Health and Nutrition Examination Survey (US NHANES)             | USA          | 1976-1980      | 3,808                        | 48.8 (16.7)   | 47.2%  | National                    | Both                 | FPG, 2hOGTT                    | Lab                 | -                             |
| United States National Health and Nutrition Examination Survey (US NHANES)             | USA          | 1988-1994      | 3,310                        | 56.7 (11.2)   | 48.7%  | National                    | Both                 | FPG, 2hOGTT                    | Lab                 | -                             |
| United States National Health and Nutrition Examination Survey (US NHANES)             | USA          | 1999-2000      | 1,943                        | 47.6 (19.8)   | 50.0%  | National                    | Both                 | FPG, HbA <sub>1c</sub>         | Lab                 | Lab                           |
| United States National Health and Nutrition Examination Survey (US NHANES)             | USA          | 2001-2002      | 2,305                        | 47.2 (20.0)   | 51.1%  | National                    | Both                 | FPG, HbA <sub>1c</sub>         | Lab                 | Lab                           |
| United States National Health and Nutrition Examination Survey (US NHANES)             | USA          | 2003-2004      | 2,111                        | 47.9 (20.8)   | 50.6%  | National                    | Both                 | FPG, HbA <sub>1c</sub>         | Lab                 | Lab                           |
| United States National Health and Nutrition Examination Survey (US NHANES)             | USA          | 2005-2006      | 2,057                        | 46.6 (20.1)   | 52.6%  | National                    | Both                 | FPG, 2hOGTT, HbA <sub>1c</sub> | Lab                 | Lab                           |

| Survey name or citation                                                    | Country | Survey year(s) | Participants $\geq 18$ years | Mean age (SD) | % Male | Level of representativeness | Rural, urban or both | Biomarkers available           | Glucose measurement | HbA <sub>1c</sub> measurement |
|----------------------------------------------------------------------------|---------|----------------|------------------------------|---------------|--------|-----------------------------|----------------------|--------------------------------|---------------------|-------------------------------|
| United States National Health and Nutrition Examination Survey (US NHANES) | USA     | 2007-2008      | 2,450                        | 49.5 (18.5)   | 49.7%  | National                    | Both                 | FPG, 2hOGTT, HbA <sub>1c</sub> | Lab                 | Lab                           |
| United States National Health and Nutrition Examination Survey (US NHANES) | USA     | 2009-2010      | 2,732                        | 48.2 (18.5)   | 47.4%  | National                    | Both                 | FPG, 2hOGTT, HbA <sub>1c</sub> | Lab                 | Lab                           |
| United States National Health and Nutrition Examination Survey (US NHANES) | USA     | 2011-2012      | 2,409                        | 47.3 (18.2)   | 50.4%  | National                    | Both                 | FPG, 2hOGTT, HbA <sub>1c</sub> | Lab                 | Lab                           |

\*Fasting glucose was measured in capillary whole blood, and was converted to plasma-equivalent by multiplying by 1.11.<sup>1</sup>

**Webtable 2:** Population-based surveys with summarised prevalence data



| Survey name                                                                          | Country     | Survey year(s) | Participants<br>≥ 18 years | Level of<br>representative-<br>ness | Rural,<br>urban<br>or both | Biomarkers<br>available           | Glucose<br>measurement | HbA <sub>1c</sub><br>measurement |
|--------------------------------------------------------------------------------------|-------------|----------------|----------------------------|-------------------------------------|----------------------------|-----------------------------------|------------------------|----------------------------------|
| China Noncommunicable Disease Survey                                                 | China       | 2010-2011      | 97,630                     | National                            | Both                       | FPG, 2hOGTT,<br>HbA <sub>1c</sub> | Lab                    | Lab                              |
| Nutrition and Health of Aging Population in China                                    | China       | 2011           | 2,241                      | Community                           | Both                       | FPG, HbA <sub>1c</sub>            | Lab                    | Lab                              |
| Kuopio Ischaemic Heart Disease Risk factor Study                                     | Finland     | 1991-1993      | 517                        | National                            | Both                       | FPG, 2hOGTT                       | Lab                    | -                                |
| Kuopio Ischaemic Heart Disease Risk factor Study                                     | Finland     | 1998-2001      | 1,135                      | National                            | Both                       | FPG, 2hOGTT                       | Lab                    | -                                |
| Kuopio Ischaemic Heart Disease Risk factor Study                                     | Finland     | 2005-2008      | 1,703                      | National                            | Both                       | FPG, 2hOGTT                       | Lab                    | -                                |
| National Monitoring of Arterial Risk (MONA LISA) in Lille                            | France      | 2004-2006      | 1,378                      | Community                           | Urban                      | FPG, HbA <sub>1c</sub>            | Lab                    | Lab                              |
| National Monitoring of Arterial Risk (MONA LISA) in Bas-Rhin                         | France      | 2005-2007      | 1,459                      | Subnational                         | Both                       | FPG, HbA <sub>1c</sub>            | Lab                    | Lab                              |
| Etude Nationale Nutrition Sante                                                      | France      | 2006-2007      | 1,936                      | National                            | Both                       | FPG, HbA <sub>1c</sub>            | Lab                    | Lab                              |
| Enquête Littorale Souffle Air Biologie Environnement (ELISABET) Dunkerque            | France      | 2011-2013      | 786                        | Community                           | Urban                      | FPG, HbA <sub>1c</sub>            | Lab                    | Lab                              |
| Enquête Littorale Souffle Air Biologie Environnement (ELISABET) Lille                | France      | 2011-2013      | 1,322                      | Community                           | Urban                      | FPG, HbA <sub>1c</sub>            | Lab                    | Lab                              |
| KORA S4 Study: Kooperative Research in the Region of Augsburg Survey 4               | Germany     | 1999-2001      | 1,641                      | Subnational                         | Both                       | FPG, 2hOGTT,<br>HbA <sub>1c</sub> | Lab                    | Lab                              |
| KORA F4 Study: Kooperative Research in the Region of Augsburg Follow-Up of Survey 4  | Germany     | 2006-2008      | 2,829                      | Subnational                         | Both                       | FPG, 2hOGTT,<br>HbA <sub>1c</sub> | Lab                    | Lab                              |
| German Health Interview and Examination Survey for Adults 2008-2011 (DEGS1)          | Germany     | 2008-2011      | 5,560                      | National                            | Both                       | FPG, HbA <sub>1c</sub>            | Lab                    | Lab                              |
| Chennai Urban Population Study (CUPS)                                                | India       | 1996-1999      | 310                        | Community                           | Urban                      | FPG, 2hOGTT                       | Lab                    | -                                |
| The Hisayama Study                                                                   | Japan       | 2002-2003      | 3,212                      | Community                           | Rural                      | FPG, HbA <sub>1c</sub>            | Lab                    | Lab                              |
| National Health and Nutrition Survey                                                 | Japan       | 2005           | 1,360                      | National                            | Both                       | FPG, HbA <sub>1c</sub>            | Lab                    | Lab                              |
| National Health and Nutrition Survey                                                 | Japan       | 2006           | 1,520                      | National                            | Both                       | FPG, HbA <sub>1c</sub>            | Lab                    | Lab                              |
| National Health and Nutrition Survey                                                 | Japan       | 2007           | 1,413                      | National                            | Both                       | FPG, HbA <sub>1c</sub>            | Lab                    | Lab                              |
| National Health and Nutrition Survey                                                 | Japan       | 2008           | 1,618                      | National                            | Both                       | FPG, HbA <sub>1c</sub>            | Lab                    | Lab                              |
| National Health and Nutrition Survey                                                 | Japan       | 2009           | 1,668                      | National                            | Both                       | FPG, HbA <sub>1c</sub>            | Lab                    | Lab                              |
| National Health and Nutrition Survey                                                 | Japan       | 2010           | 1,430                      | National                            | Both                       | FPG, HbA <sub>1c</sub>            | Lab                    | Lab                              |
| Observation des Risques et de la Sante Cardio-Vasculaire au Luxembourg (ORISCAV-LUX) | Luxembourg  | 2007-2009      | 1,200                      | National                            | Both                       | FPG, HbA <sub>1c</sub>            | Lab                    | Lab                              |
| Healthy Life in an Urban Setting (HELIUS)                                            | Netherlands | 2011-2013      | 1,380                      | Community                           | Urban                      | FPG, HbA <sub>1c</sub>            | Lab                    | Lab                              |

| <b>Survey name</b>                                                                                     | <b>Country</b> | <b>Survey year(s)</b> | <b>Participants<br/>≥ 18 years</b> | <b>Level of<br/>representative-<br/>ness</b> | <b>Rural,<br/>urban<br/>or both</b> | <b>Biomarkers<br/>available</b> | <b>Glucose<br/>measurement</b> | <b>HbA<sub>1c</sub><br/>measurement</b> |
|--------------------------------------------------------------------------------------------------------|----------------|-----------------------|------------------------------------|----------------------------------------------|-------------------------------------|---------------------------------|--------------------------------|-----------------------------------------|
| Life Course Study in Cardiovascular Disease Epidemiology                                               | Philippines    | 2009                  | 623                                | Subnational                                  | Both                                | FPG, 2hOGTT                     | Lab                            | -                                       |
| Study of prevalence and control of CVD risk factors in the general adult population in Poland (NATPOL) | Poland         | 2011                  | 535                                | National                                     | Both                                | FPG, HbA <sub>1c</sub>          | Lab                            | Lab                                     |
| Singapore Health Study 2012                                                                            | Singapore      | 2012-2013             | 1,712                              | National                                     | Both                                | FPG, HbA <sub>1c</sub>          | Lab                            | Lab                                     |
| Taiwanese Survey on Hypertension, Hyperglycemia and Hyperlipidemia                                     | Taiwan         | 2002                  | 6,015                              | National                                     | Both                                | FPG, HbA <sub>1c</sub>          | Lab                            | Lab                                     |
| Taiwanese Survey on Hypertension, Hyperglycemia and Hyperlipidemia                                     | Taiwan         | 2007                  | 4,023                              | National                                     | Both                                | FPG, HbA <sub>1c</sub>          | Lab                            | Lab                                     |
| Edinburgh Artery Study                                                                                 | UK             | 1987-1988             | 342                                | Community                                    | Urban                               | FPG, 2hOGTT                     | Lab                            | -                                       |

**Webfigure 1:** Regional random effects in the regression of diabetes prevalence defined based on HbA<sub>1c</sub> (HbA<sub>1c</sub>  $\geq$  6.5% or history of diabetes or using insulin or oral hypoglycaemic agents) against diabetes prevalence defined based on FPG (FPG  $\geq$  7.0 mmol/L or history of diabetes or using insulin or oral hypoglycaemic agents)

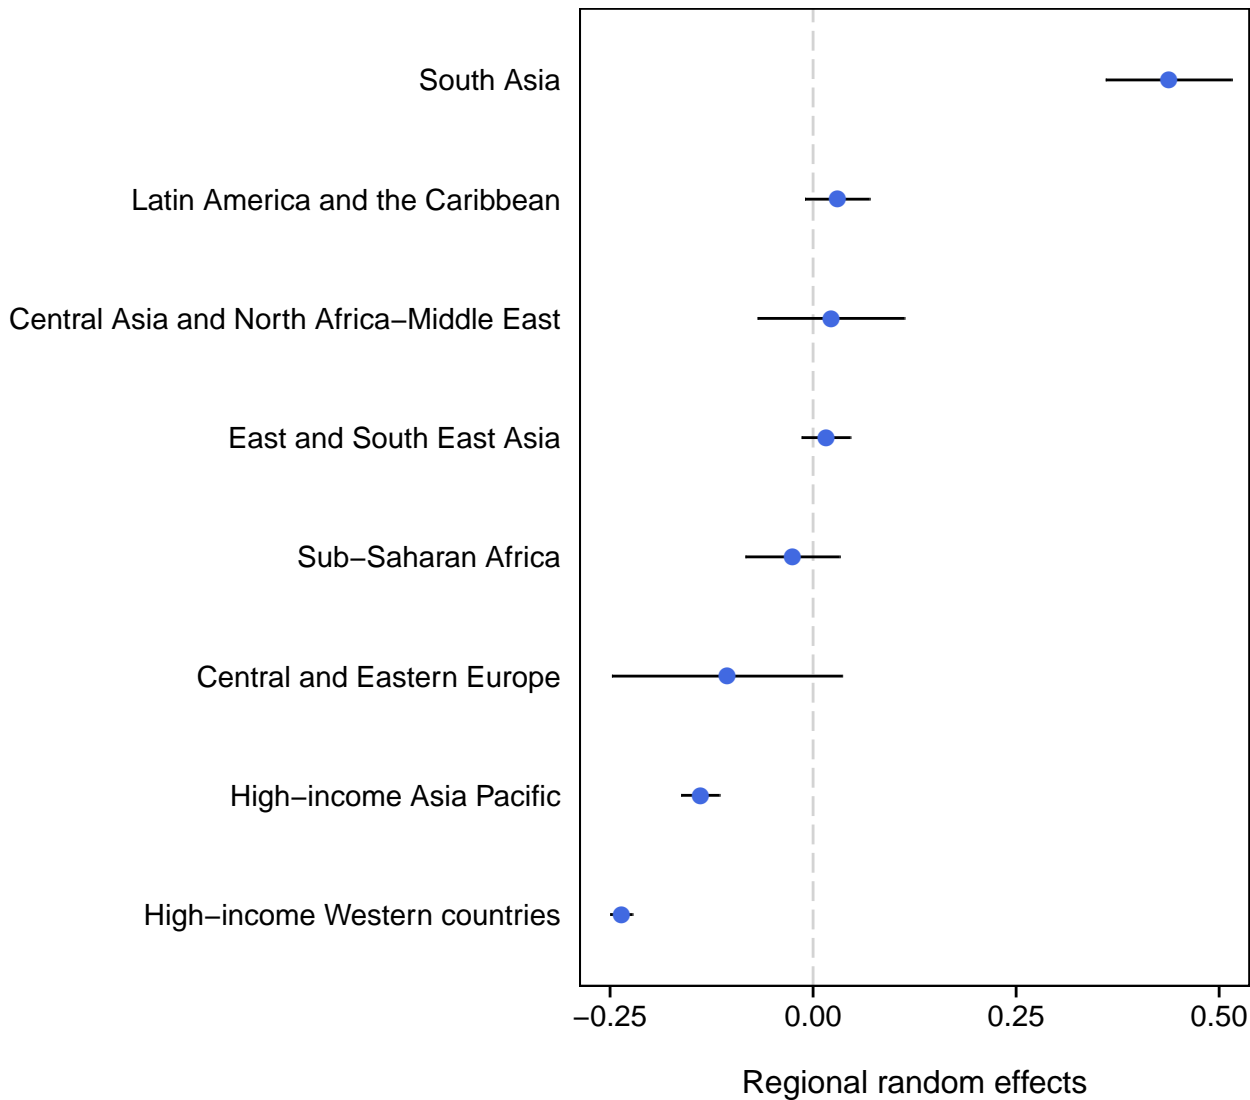

**Webfigure 2:** Random effect meta-analysis of diabetes diagnostic sensitivity of  $\text{HbA}_{1c} \geq 6.5\%$  vs.  $\text{FPG} \geq 7.0$  mmol/L in previously-undiagnosed participants

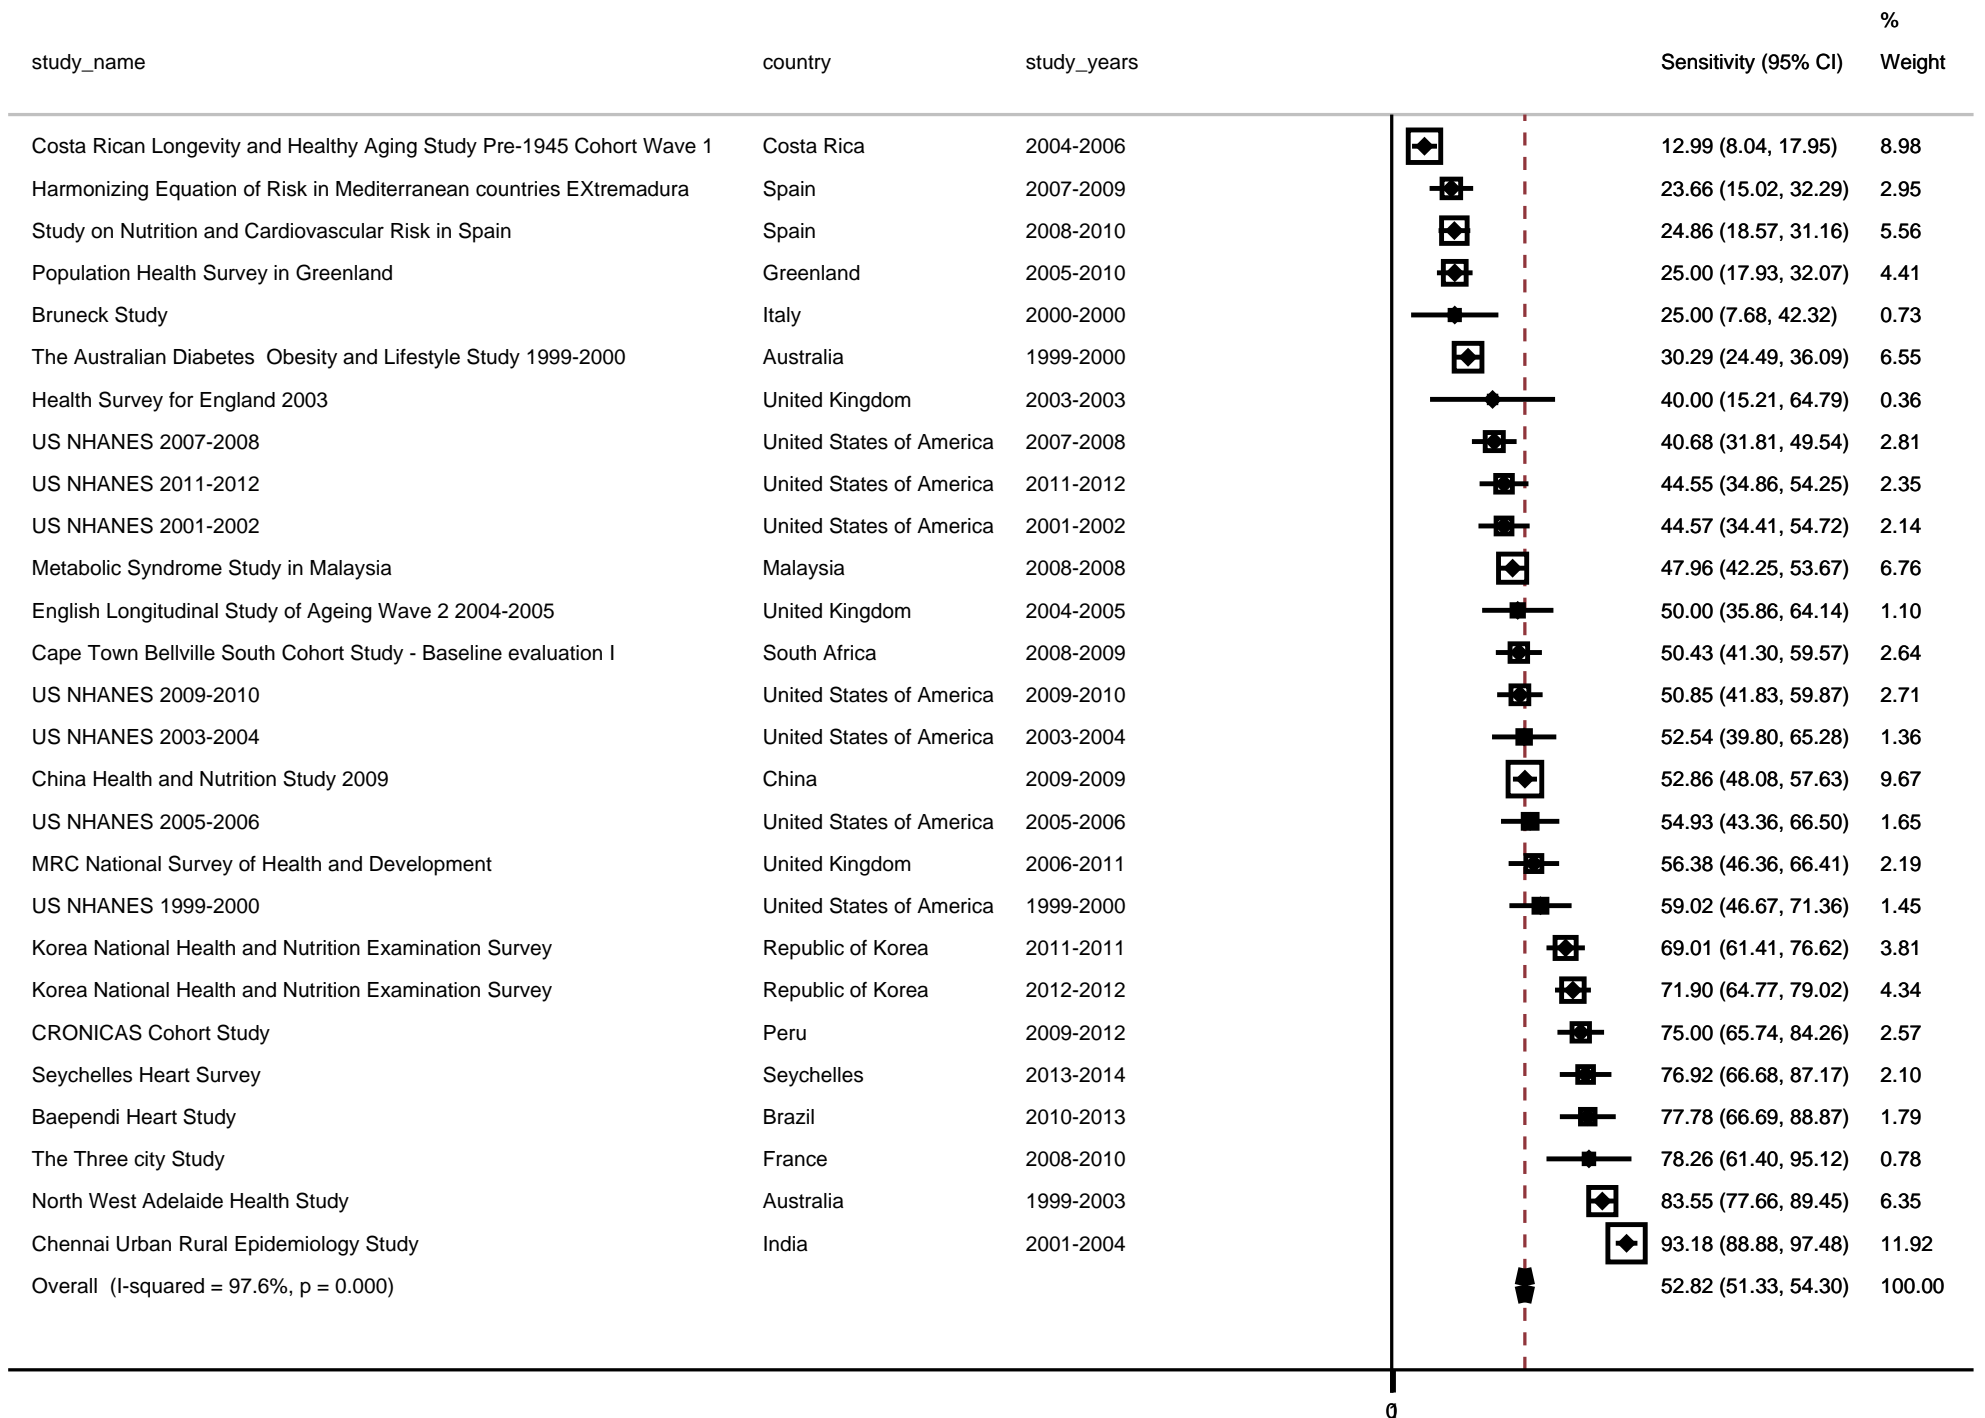

**Webfigure 3:** Random effect meta-analysis of diabetes diagnostic specificity of  $\text{HbA}_{1c} \geq 6.5\%$  vs.  $\text{FPG} \geq 7.0$  mmol/L in previously-undiagnosed participants

| study_name                                                           | country                  | study_years | Specificity (95% CI)  | Weight |
|----------------------------------------------------------------------|--------------------------|-------------|-----------------------|--------|
| Seychelles Heart Survey                                              | Seychelles               | 2013-2014   | 88.13 (86.16, 90.11)  | 0.03   |
| The Three city Study                                                 | France                   | 2008-2010   | 90.86 (88.56, 93.17)  | 0.02   |
| Chennai Urban Rural Epidemiology Study                               | India                    | 2001-2004   | 92.30 (91.15, 93.46)  | 0.09   |
| Baependi Heart Study                                                 | Brazil                   | 2010-2013   | 94.09 (92.85, 95.33)  | 0.08   |
| CRONICAS Cohort Study                                                | Peru                     | 2009-2012   | 94.57 (93.74, 95.40)  | 0.17   |
| Cape Town Bellville South Cohort Study - Baseline evaluation I       | South Africa             | 2008-2009   | 94.57 (92.89, 96.25)  | 0.04   |
| China Health and Nutrition Study 2009                                | China                    | 2009-2009   | 96.74 (96.35, 97.13)  | 0.76   |
| Metabolic Syndrome Study in Malaysia                                 | Malaysia                 | 2008-2008   | 96.98 (96.40, 97.56)  | 0.35   |
| North West Adelaide Health Study                                     | Australia                | 1999-2003   | 97.07 (96.53, 97.61)  | 0.41   |
| Bruneck Study                                                        | Italy                    | 2000-2000   | 97.23 (95.93, 98.53)  | 0.07   |
| Korea National Health and Nutrition Examination Survey               | Republic of Korea        | 2012-2012   | 97.62 (97.19, 98.04)  | 0.64   |
| Korea National Health and Nutrition Examination Survey               | Republic of Korea        | 2011-2011   | 97.97 (97.59, 98.35)  | 0.80   |
| Population Health Survey in Greenland                                | Greenland                | 2005-2010   | 97.98 (97.46, 98.50)  | 0.44   |
| MRC National Survey of Health and Development                        | United Kingdom           | 2006-2011   | 98.33 (97.72, 98.93)  | 0.32   |
| US NHANES 2011-2012                                                  | United States of America | 2011-2012   | 98.41 (97.86, 98.95)  | 0.39   |
| Costa Rican Longevity and Healthy Aging Study Pre-1945 Cohort Wave 1 | Costa Rica               | 2004-2006   | 98.44 (97.89, 98.99)  | 0.38   |
| English Longitudinal Study of Ageing Wave 2 2004-2005                | United Kingdom           | 2004-2005   | 98.91 (98.55, 99.26)  | 0.93   |
| US NHANES 2007-2008                                                  | United States of America | 2007-2008   | 98.92 (98.47, 99.37)  | 0.58   |
| US NHANES 2009-2010                                                  | United States of America | 2009-2010   | 99.05 (98.65, 99.44)  | 0.75   |
| Health Survey for England 2003                                       | United Kingdom           | 2003-2003   | 99.23 (98.62, 99.84)  | 0.32   |
| US NHANES 2001-2002                                                  | United States of America | 2001-2002   | 99.27 (98.90, 99.64)  | 0.87   |
| US NHANES 2003-2004                                                  | United States of America | 2003-2004   | 99.41 (99.07, 99.76)  | 0.99   |
| US NHANES 2005-2006                                                  | United States of America | 2005-2006   | 99.50 (99.17, 99.83)  | 1.10   |
| US NHANES 1999-2000                                                  | United States of America | 1999-2000   | 99.72 (99.48, 99.97)  | 1.96   |
| Harmonizing Equation of Risk in Mediterranean countries EXtremadura  | Spain                    | 2007-2009   | 99.87 (99.73, 100.02) | 5.86   |
| Study on Nutrition and Cardiovascular Risk in Spain                  | Spain                    | 2008-2010   | 99.91 (99.86, 99.97)  | 41.01  |
| The Australian Diabetes Obesity and Lifestyle Study 1999-2000        | Australia                | 1999-2000   | 99.92 (99.87, 99.98)  | 40.65  |
| Overall (I-squared = 98.2%, p = 0.000)                               |                          |             | 99.74 (99.71, 99.78)  | 100.00 |



**Webfigure 4:** Random effect meta-analysis of diabetes diagnostic sensitivity of  $\text{HbA}_{1c} \geq 6.5\%$  vs.  $2\text{hOGTT} \geq 11.1$  mmol/L in previously-undiagnosed participants

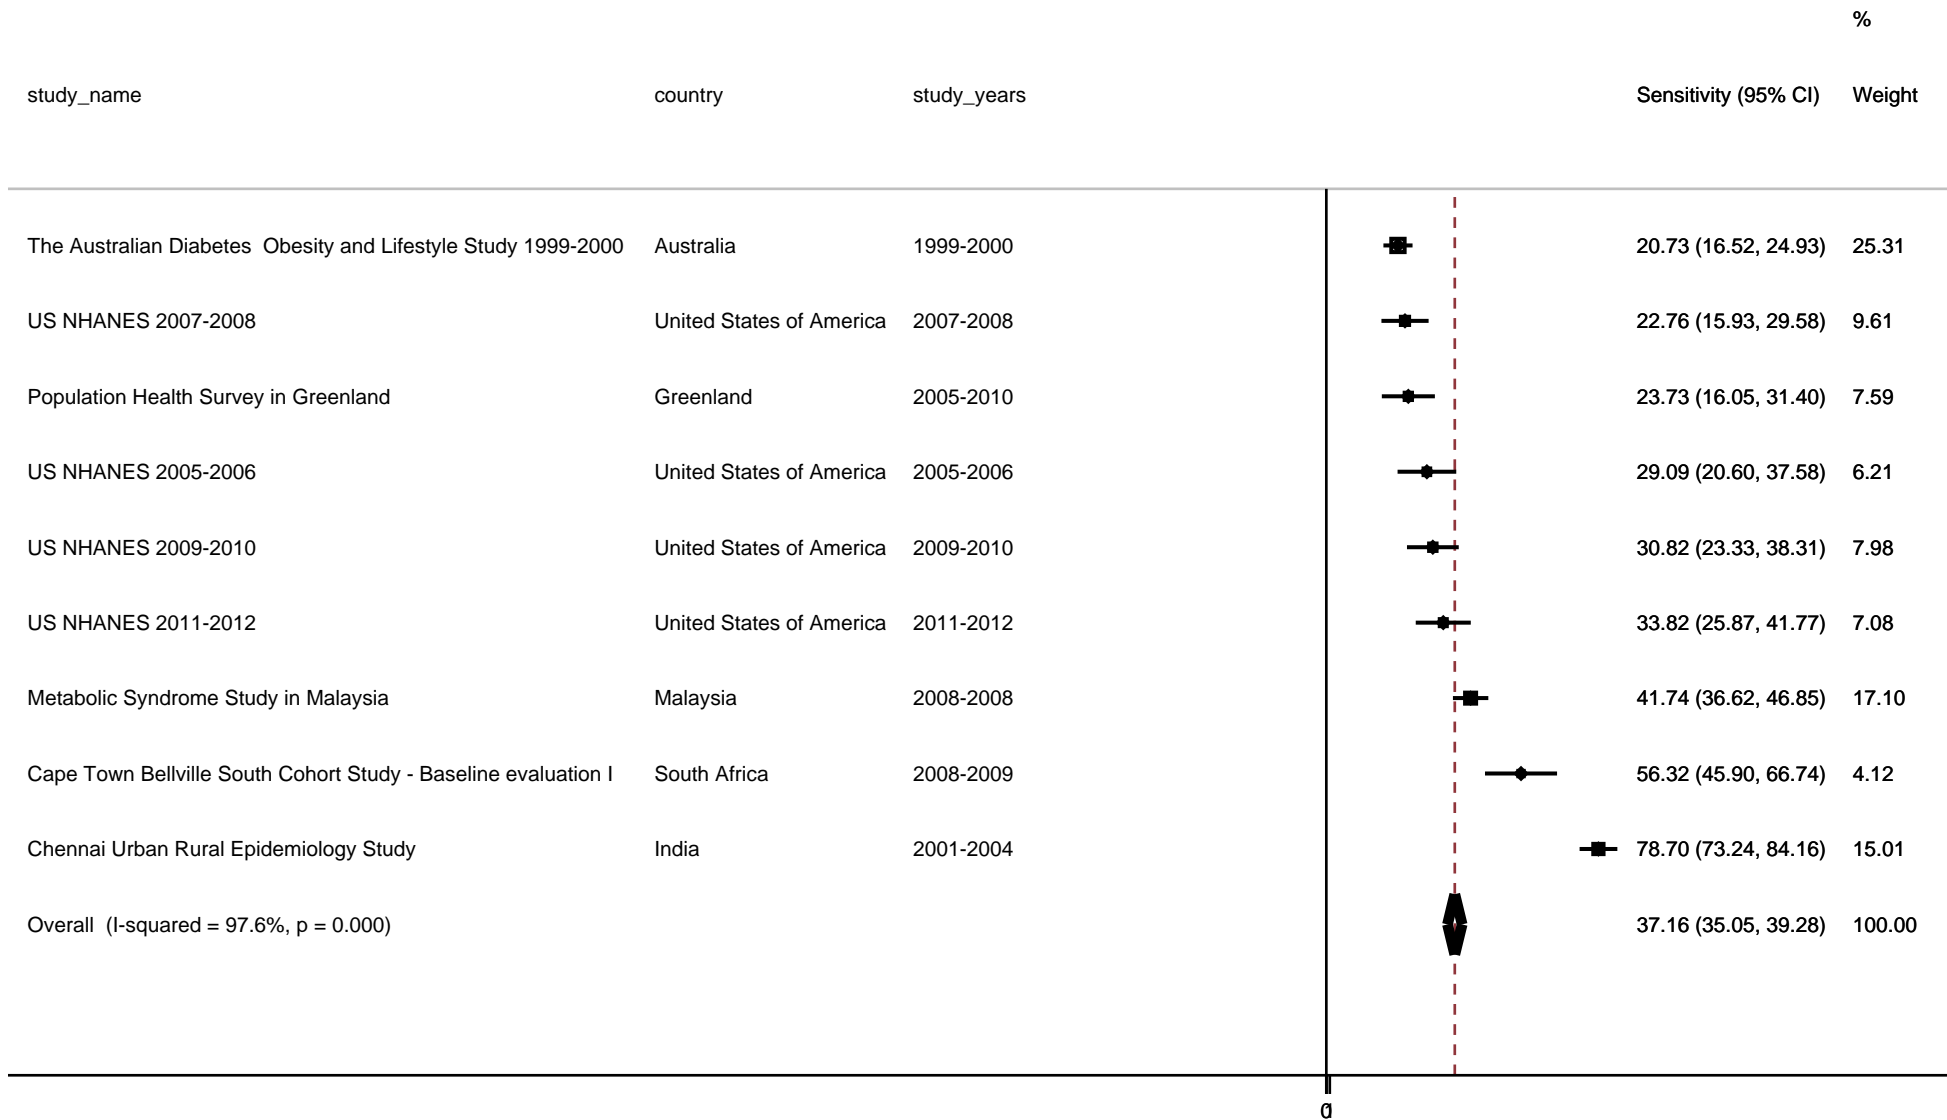

**Webfigure 5:** Random effect meta-analysis of diabetes diagnostic specificity of  $\text{HbA}_{1c} \geq 6.5\%$  vs.  $2\text{hOGTT} \geq 11.1$  mmol/L in previously-undiagnosed participants

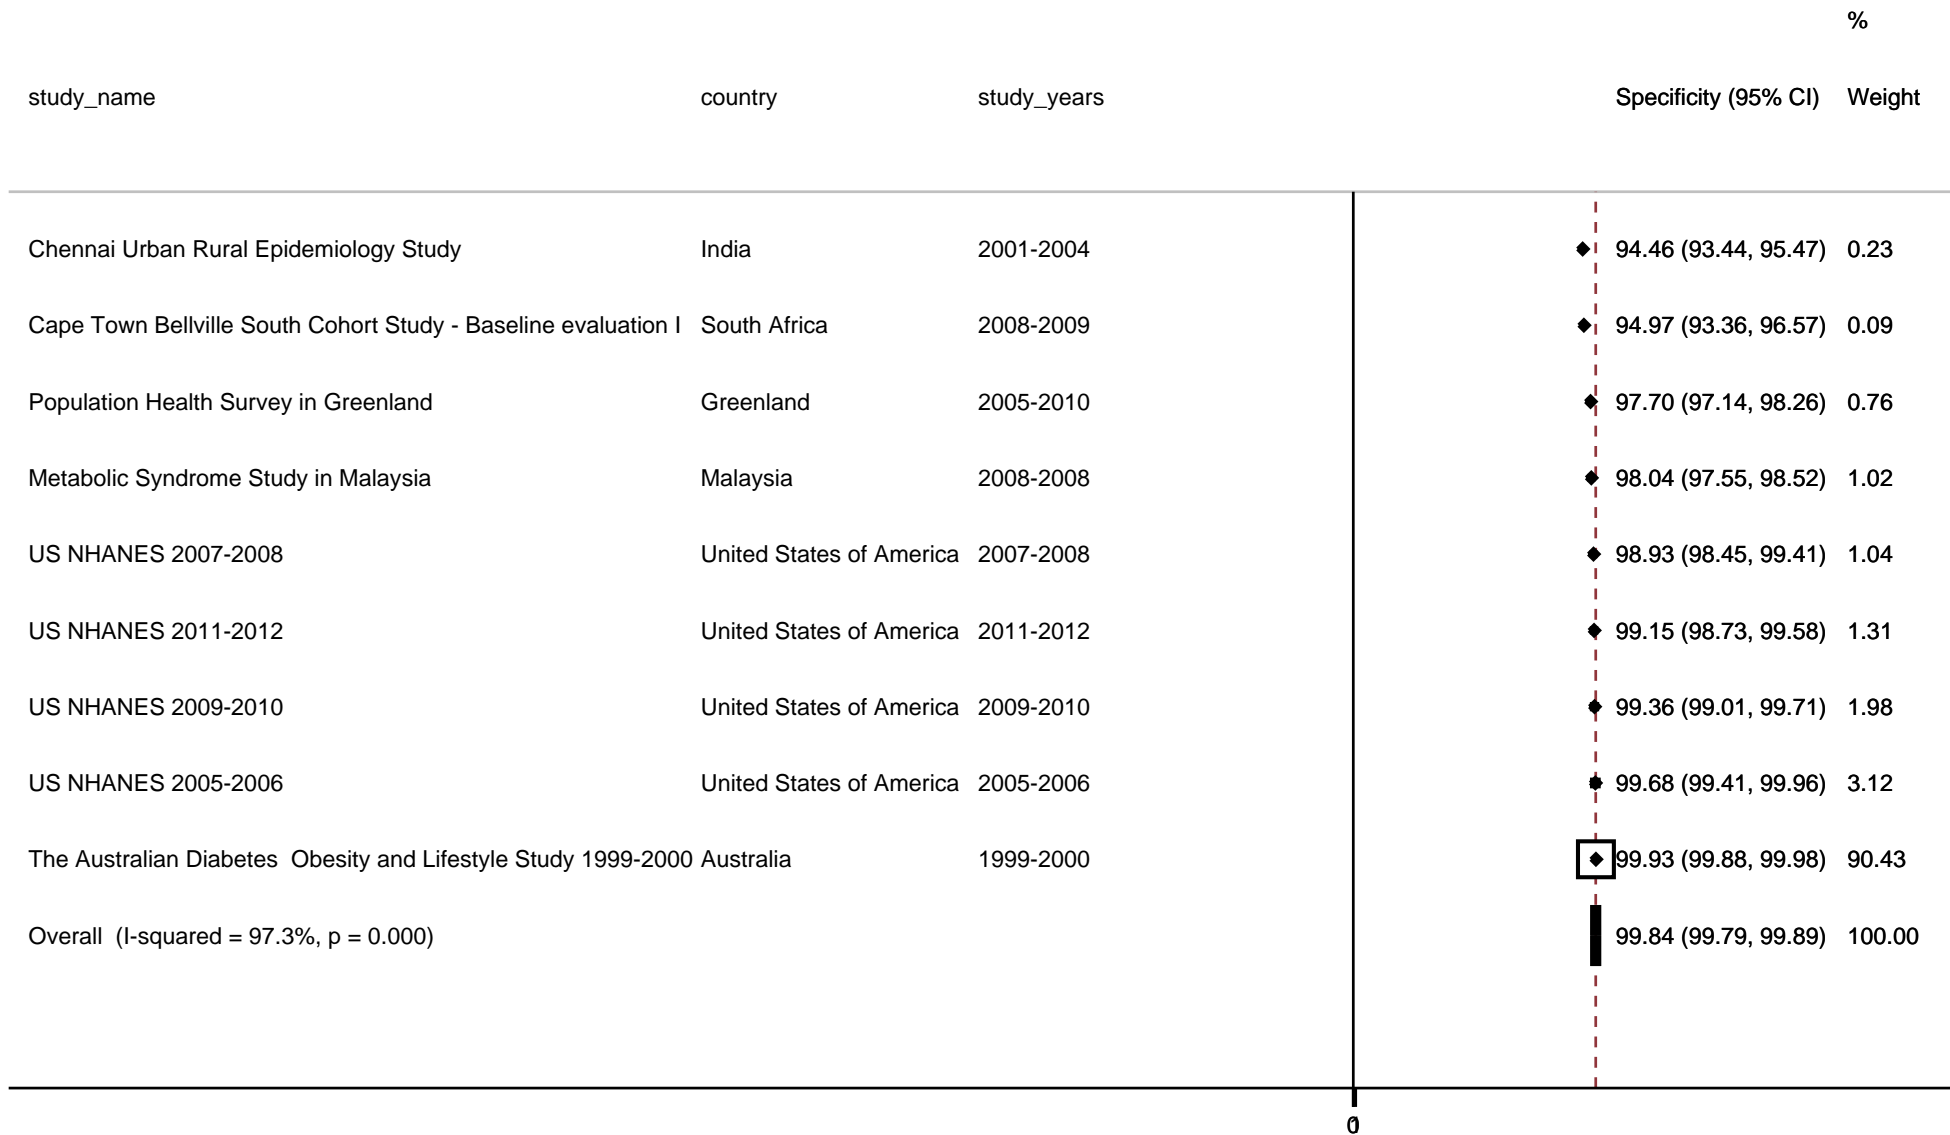

**Webfigure 6:** Random effect meta-analysis of diabetes diagnostic sensitivity of  $\text{HbA}_{1c} \geq 6.5\%$  vs.  $\text{FPG} \geq 7.0$  mmol/L or  $2\text{hOGTT} \geq 11.1$  mmol/L in previously-undiagnosed participants

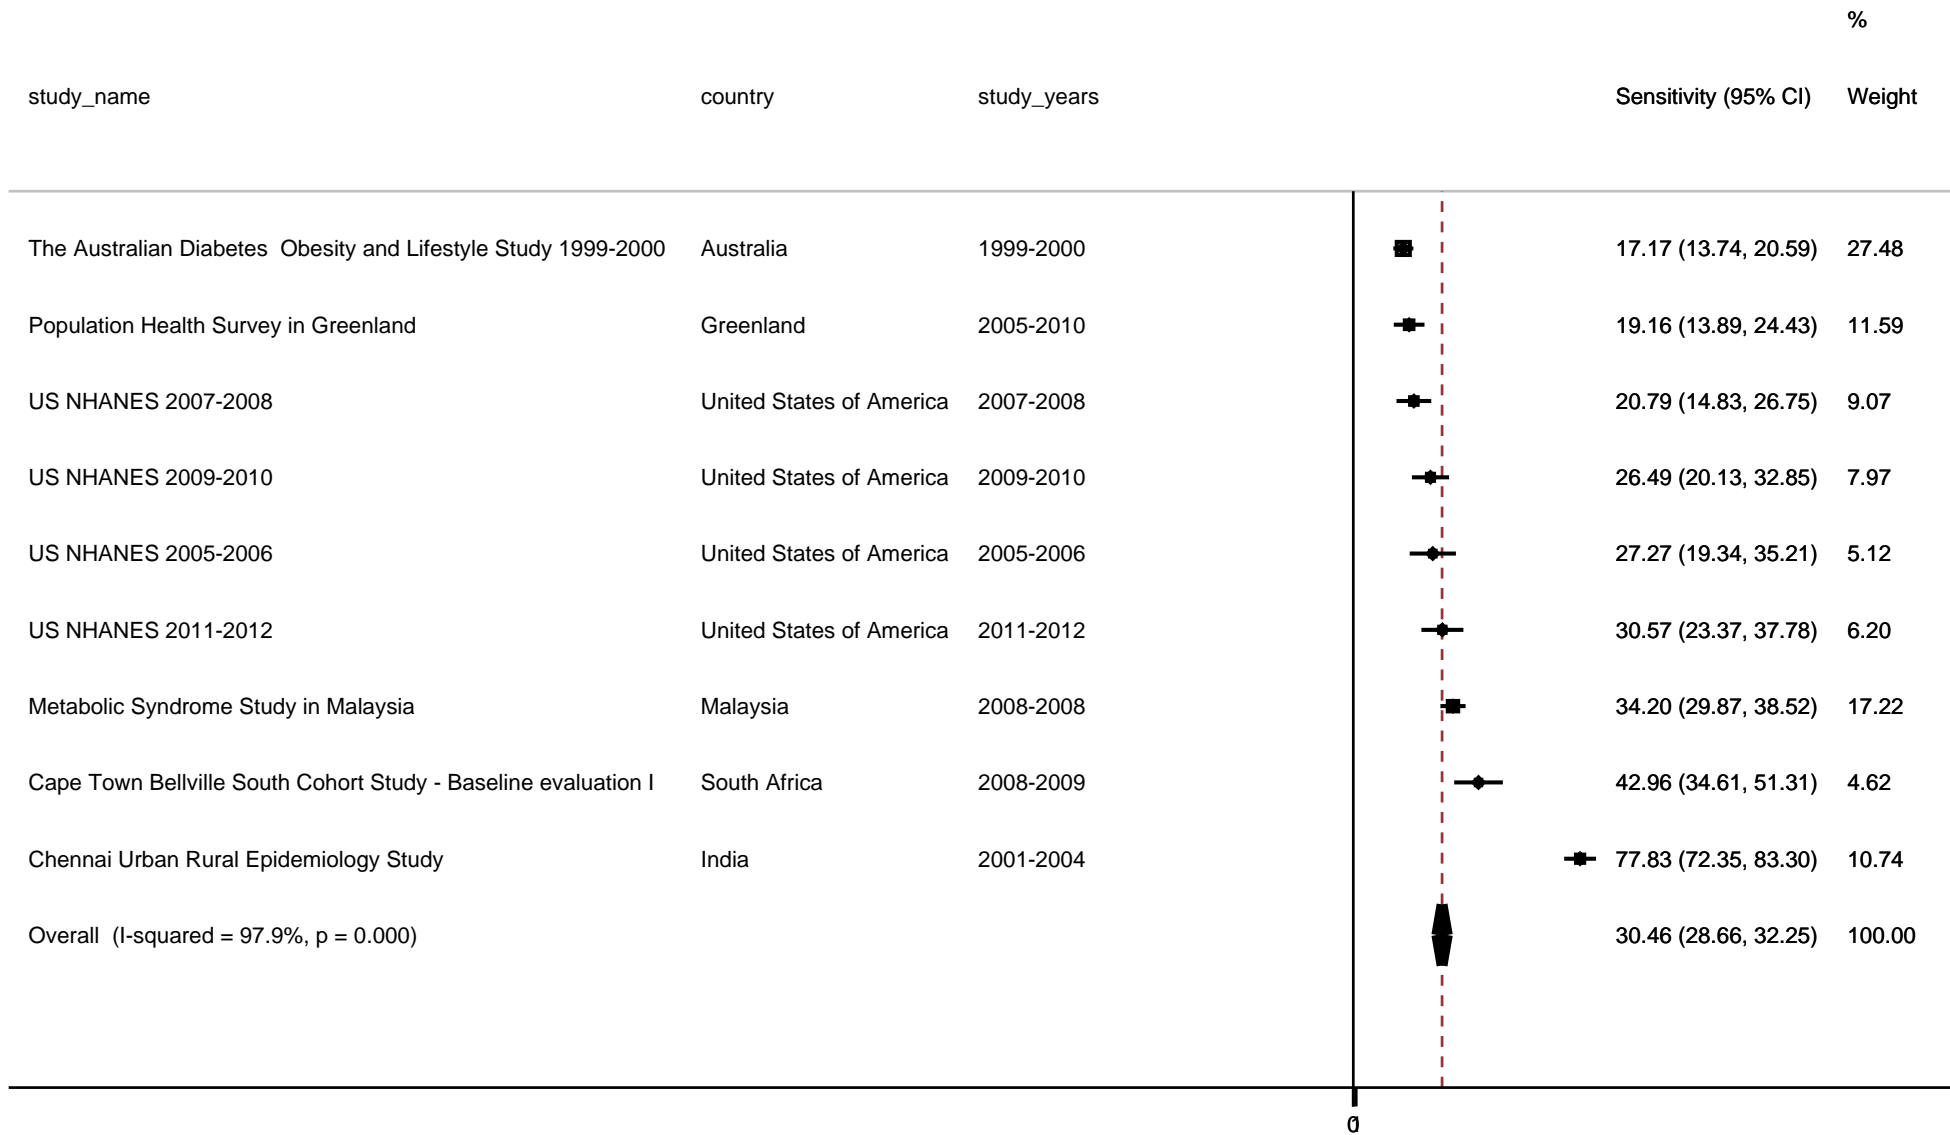

**Webfigure 7:** Random effect meta-analysis of diabetes diagnostic specificity of  $\text{HbA}_{1c} \geq 6.5\%$  vs.  $\text{FPG} \geq 7.0$  mmol/L or  $2\text{hOGTT} \geq 11.1$  mmol/L in previously-undiagnosed participants

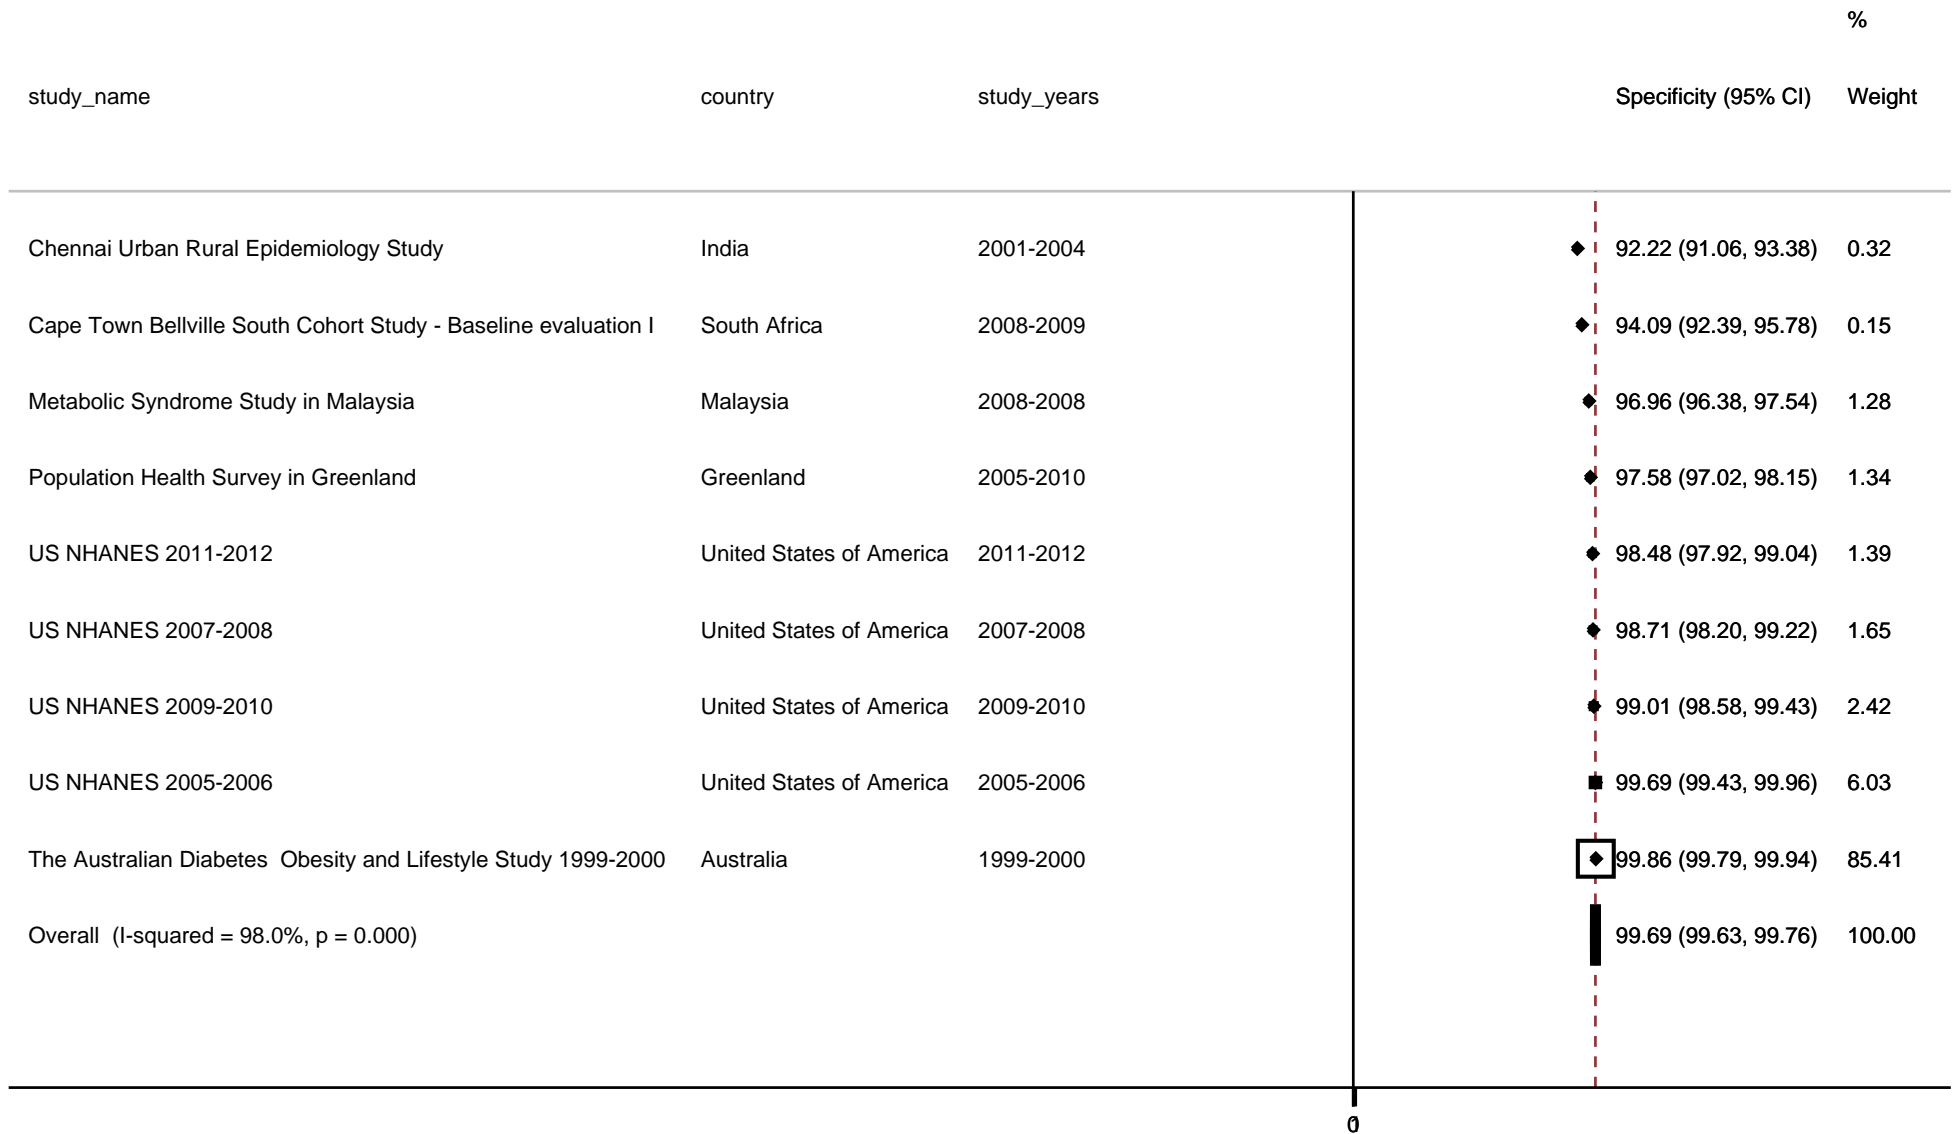



**Webfigure 8:** Random effect meta-analysis of diabetes diagnostic sensitivity of FPG  $\geq 7.0$  mmol/L vs. 2hOGTT  $\geq 11.1$  mmol/L in previously-undiagnosed participants

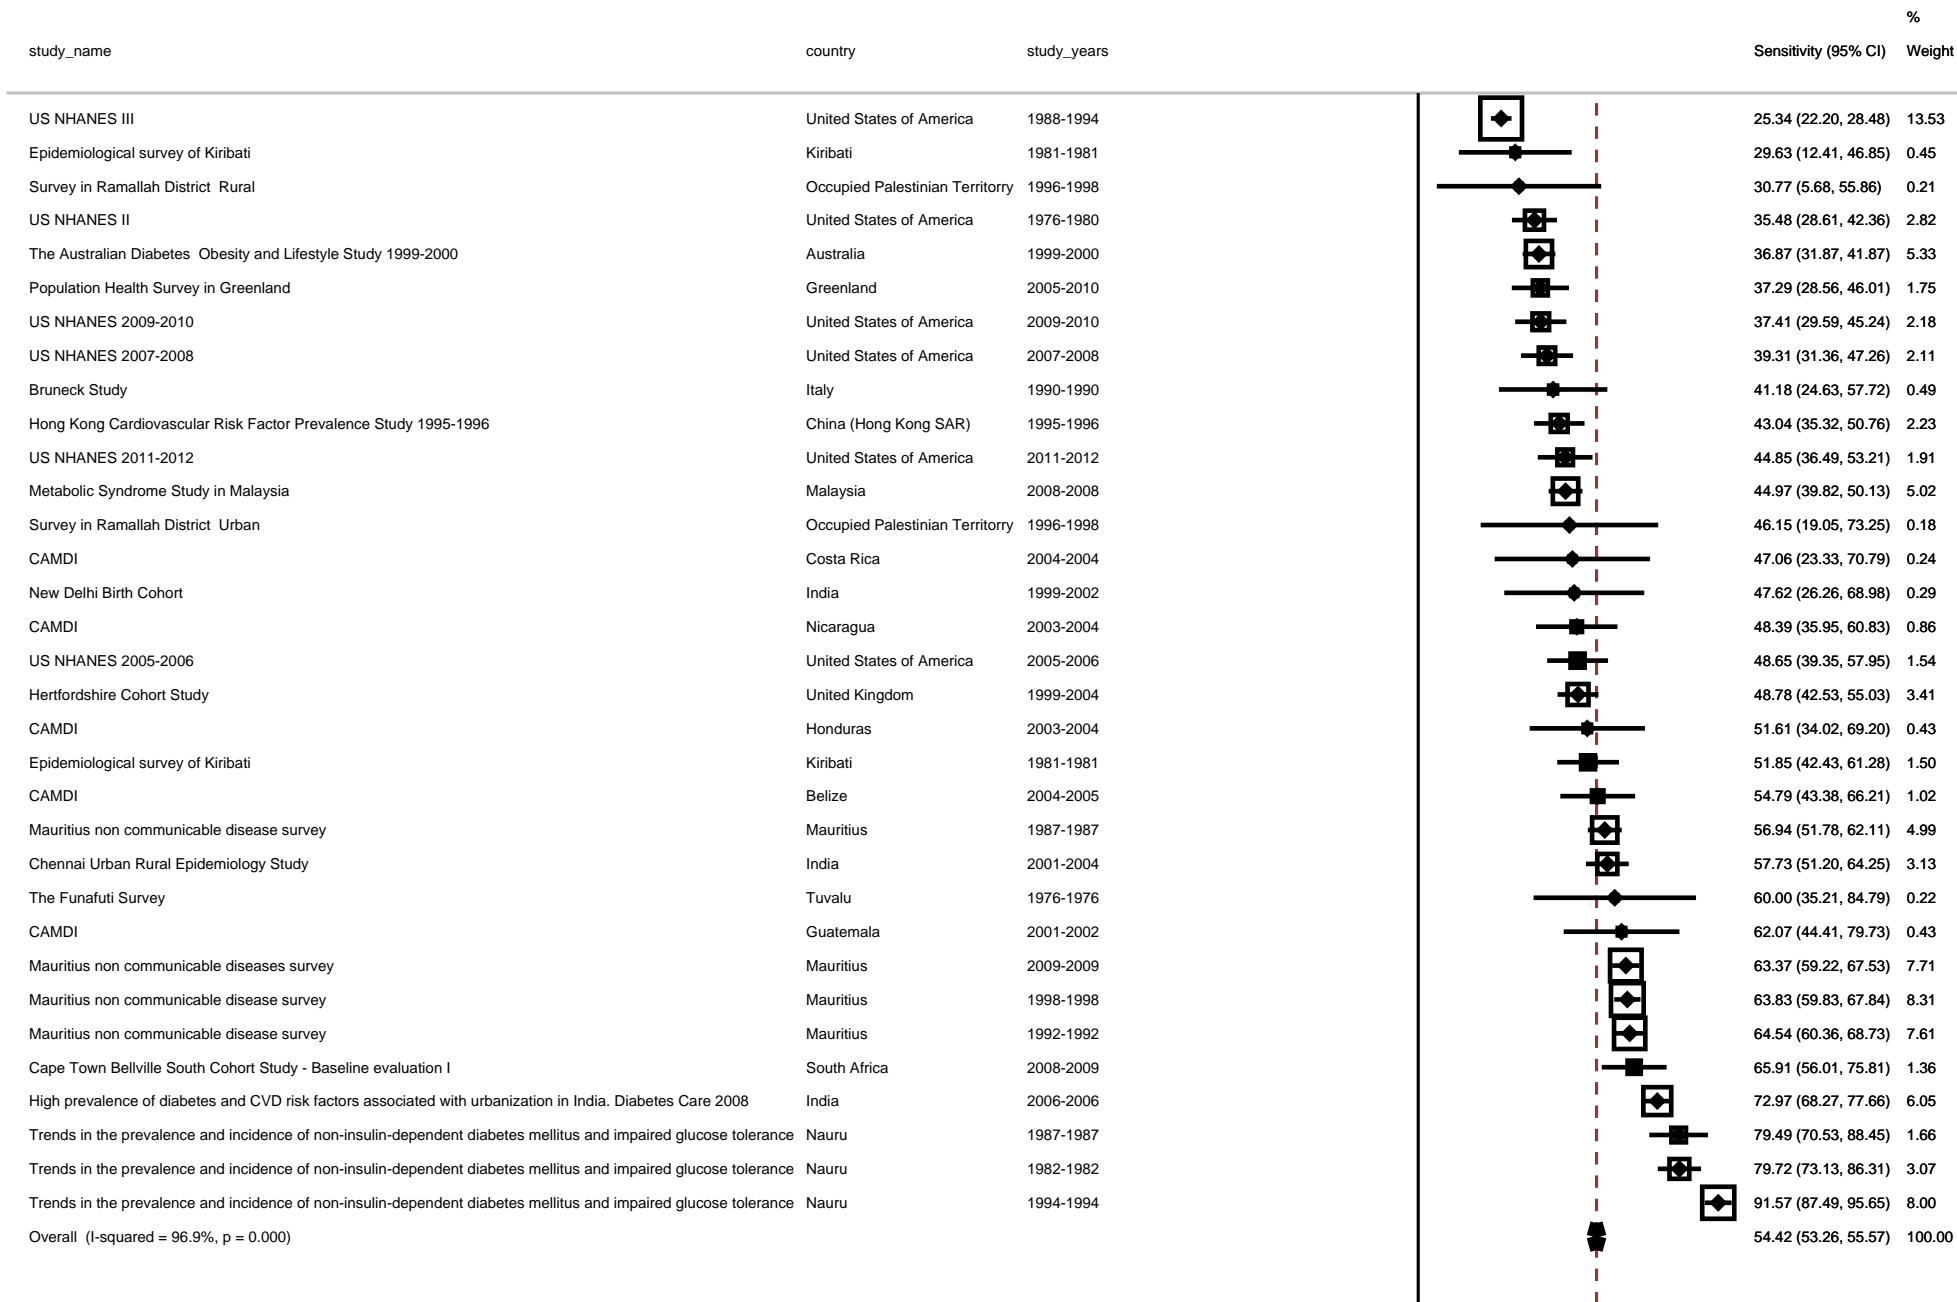

**Webfigure 9:** Random effect meta-analysis of diabetes diagnostic specificity of FPG  $\geq$  7.0 mmol/L vs. 2hOGTT  $\geq$  11.1 mmol/L in previously-undiagnosed participants

| study_name                                                                                                       | country                        | study_years | Specificity (95% CI)  | % Weight |
|------------------------------------------------------------------------------------------------------------------|--------------------------------|-------------|-----------------------|----------|
| Trends in the prevalence and incidence of non-insulin-dependent diabetes mellitus and impaired glucose tolerance | Nauru                          | 1994-1994   | 92.73 (91.10, 94.35)  | 0.20     |
| Cape Town Bellville South Cohort Study - Baseline evaluation I                                                   | South Africa                   | 2008-2009   | 93.30 (91.46, 95.13)  | 0.16     |
| Trends in the prevalence and incidence of non-insulin-dependent diabetes mellitus and impaired glucose tolerance | Nauru                          | 1987-1987   | 93.32 (91.59, 95.06)  | 0.18     |
| Population Health Survey in Greenland                                                                            | Greenland                      | 2005-2010   | 96.51 (95.82, 97.20)  | 1.12     |
| Hertfordshire Cohort Study                                                                                       | United Kingdom                 | 1999-2004   | 96.66 (95.96, 97.36)  | 1.07     |
| Metabolic Syndrome Study in Malaysia                                                                             | Malaysia                       | 2008-2008   | 96.66 (96.04, 97.29)  | 1.35     |
| Mauritius non communicable diseases survey                                                                       | Mauritius                      | 2009-2009   | 96.92 (96.42, 97.41)  | 2.16     |
| Trends in the prevalence and incidence of non-insulin-dependent diabetes mellitus and impaired glucose tolerance | Nauru                          | 1982-1982   | 97.16 (96.15, 98.16)  | 0.52     |
| New Delhi Birth Cohort                                                                                           | India                          | 1999-2002   | 97.16 (96.29, 98.03)  | 0.70     |
| Mauritius non communicable disease survey                                                                        | Mauritius                      | 1992-1992   | 97.47 (97.05, 97.89)  | 2.97     |
| Mauritius non communicable disease survey                                                                        | Mauritius                      | 1998-1998   | 98.08 (97.66, 98.50)  | 2.99     |
| US NHANES 2009-2010                                                                                              | United States of America       | 2009-2010   | 98.08 (97.48, 98.68)  | 1.48     |
| Epidemiological survey of Kiribati                                                                               | Kiribati                       | 1981-1981   | 98.11 (97.44, 98.78)  | 1.17     |
| US NHANES 2007-2008                                                                                              | United States of America       | 2007-2008   | 98.15 (97.52, 98.77)  | 1.34     |
| Survey in Ramallah District Urban                                                                                | Occupied Palestinian Territory | 1996-1998   | 98.44 (97.43, 99.45)  | 0.52     |
| CAMDI                                                                                                            | Belize                         | 2004-2005   | 98.46 (97.77, 99.15)  | 1.12     |
| Mauritius non communicable disease survey                                                                        | Mauritius                      | 1987-1987   | 98.56 (98.20, 98.92)  | 4.17     |
| US NHANES 2011-2012                                                                                              | United States of America       | 2011-2012   | 98.82 (98.31, 99.32)  | 2.08     |
| CAMDI                                                                                                            | Costa Rica                     | 2004-2004   | 98.83 (98.15, 99.52)  | 1.13     |
| US NHANES III                                                                                                    | United States of America       | 1988-1994   | 98.87 (98.57, 99.17)  | 5.97     |
| The Australian Diabetes Obesity and Lifestyle Study 1999-2000                                                    | Australia                      | 1999-2000   | 98.92 (98.72, 99.13)  | 13.09    |
| CAMDI                                                                                                            | Honduras                       | 2003-2004   | 99.03 (98.46, 99.60)  | 1.62     |
| US NHANES II                                                                                                     | United States of America       | 1976-1980   | 99.12 (98.81, 99.43)  | 5.54     |
| Bruneck Study                                                                                                    | Italy                          | 1990-1990   | 99.16 (98.54, 99.78)  | 1.37     |
| The Funafuti Survey                                                                                              | Tuvalu                         | 1976-1976   | 99.25 (98.40, 100.10) | 0.74     |
| US NHANES 2005-2006                                                                                              | United States of America       | 2005-2006   | 99.31 (98.90, 99.72)  | 3.17     |
| CAMDI                                                                                                            | Nicaragua                      | 2003-2004   | 99.40 (99.00, 99.79)  | 3.41     |
| Hong Kong Cardiovascular Risk Factor Prevalence Study 1995-1996                                                  | China (Hong Kong SAR)          | 1995-1996   | 99.40 (99.10, 99.70)  | 5.75     |
| High prevalence of diabetes and CVD risk factors associated with urbanization in India. Diabetes Care 2008       | India                          | 2006-2006   | 99.42 (99.23, 99.61)  | 14.72    |
| CAMDI                                                                                                            | Guatemala                      | 2001-2002   | 99.50 (99.01, 99.99)  | 2.19     |
| Epidemiological survey of Kiribati                                                                               | Kiribati                       | 1981-1981   | 99.57 (99.16, 99.99)  | 3.05     |
| Survey in Ramallah District Rural                                                                                | Occupied Palestinian Territory | 1996-1998   | 99.64 (99.15, 100.14) | 2.15     |
| Chennai Urban Rural Epidemiology Study                                                                           | India                          | 2001-2004   | 99.75 (99.53, 99.97)  | 10.83    |
| Overall (I-squared = 94.4%, p = 0.000)                                                                           |                                |             | 98.90 (98.83, 98.97)  | 100.00   |

**References**

1. Sacks DB, Arnold M, Bakris GL, et al. Guidelines and recommendations for laboratory analysis in the diagnosis and management of diabetes mellitus. *Clin Chem* 2011; **57**(6): e1-e47.
